# Supplementary material
Source: publisher site journal article supplement (https://www.dovepress.com/article/418455)
Supplement: Supplementary file 1 [file get_supplementary_file.php]

**Supplementary Material for**

**Emergence of ST1193 Clone in Maternal and Neonatal ESBL-Producing *E. coli* Isolates**

Ling Wei1#, Qiyan Chen2, 3#, Lu Yang2, 3, Tongzhen Ji4, Wenjing Peng5, Bing Shao2*, Hui Li2*

1Department of Obstetrics, Beijing Obstetrics and Gynecology Hospital, Capital Medical University, Beijing Maternal and Child Health Care Hospital, Beijing 100026, China.

2Beijing Key Laboratory of Diagnostic and Traceability Technologies for Food Poisoning, Beijing Center for Disease Prevention and Control, Beijing 100013, China.

3National Center for Veterinary Drug Safety Evaluation, College of Veterinary Medicine, China Agricultural University, Beijing 100193, China.

4Department of Clinical Laboratory, Beijing Obstetrics and Gynecology Hospital, Capital Medical University, Beijing Maternal and Child Health Care Hospital, Beijing 100026, China.

5College of Animal Husbandry and Veterinary Medicine, Jinzhou Medical University, Jinzhou 121001, China.

***Corresponding author**

Hui Li, [lihui@bjcdc.org](mailto:lihui@bjcdc.org); Bing Shao, [shaobingch@sina.com](mailto:shaobingch@sina.com).

#These authors contributed equally to this work.

**Running Title:** ST1193 clone in ESBL-EC from maternal and newborn

**Table S1.** Phenotypic resistance of 33 ESBL-producing *E. coli* isolates to 17 selected antimicrobial agents.

| **Isolate** | **Sampling date** | **Sample type** | **Origin** | **IMI** | **MERO** | **FEP** | **CTX** | **CAZ** | **FOX** | **TGC** | **TET** | **POL** | **COL** | **AMP** | **AMC** | **AMI** | **KAN** | **GEN** | **CIP** | **FFC** |
| --- | --- | --- | --- | --- | --- | --- | --- | --- | --- | --- | --- | --- | --- | --- | --- | --- | --- | --- | --- | --- |
| 20CDC1 | 8-Apr-20 | throat swab | newborn | 0.125 | <0.06 | 8 | >32 | 16 | 4 | 0.5 | 128 | 0.5 | 0.5 | >512 | 16/8 | 2 | 2 | 1 | 0.25 | 8 |
| 20CDC2 | 22-Apr-20 | throat swab | newborn | 0.06 | <0.06 | 1 | 4 | 2 | 4 | 1 | 64 | 0.5 | 0.5 | >512 | 16/8 | 2 | 16 | 256 | 0.25 | 8 |
| 20CDC3 | 14-Jan-20 | placenta | maternal | 0.125 | <0.06 | 0.06 | 2 | 8 | 32 | 1 | 256 | 0.5 | 2 | 128 | 64/32 | 1 | 4 | 128 | <0.125 | 8 |
| 20CDC4 | 17-Feb-20 | throat swab | newborn | 0.06 | <0.06 | 1 | 4 | 64 | 4 | 0.5 | 256 | 0.5 | 0.5 | 512 | 16/8 | 1 | 256 | 128 | 32 | >256 |
| 20CDC5 | 28-Feb-20 | uterine incision | maternal | 0.125 | <0.06 | 4 | 32 | 8 | 4 | 0.5 | 256 | 0.25 | 0.25 | >512 | 16/8 | 1 | 1 | 0.25 | <0.125 | 4 |
| 20CDC6 | 9-Mar-20 | placenta | maternal | 0.25 | 0.125 | 4 | 32 | 8 | 4 | 0.5 | 256 | 0.5 | 0.25 | >512 | 16/8 | 1 | 2 | 0.25 | 0.25 | 8 |
| 20CDC7 | 1-Apr-20 | placenta | maternal | 0.06 | <0.06 | 0.5 | 2 | <0.125 | 4 | 1 | 128 | 0.5 | 0.25 | 256 | 8/4 | 1 | 2 | 1 | <0.125 | 4 |
| 20CDC8 | 16-Jan-20 | cord blood | newborn | 0.125 | <0.06 | 1 | 16 | 32 | 2 | 0.5 | 256 | 0.25 | 0.25 | >512 | 16/8 | 1 | 2 | 1 | <0.125 | 8 |
| 20CDC9 | 16-Apr-20 | placenta | maternal | 0.125 | <0.06 | 4 | 16 | 32 | 4 | 0.5 | 1 | <0.125 | 0.25 | >512 | 16/8 | 1 | 4 | 1 | 0.25 | 8 |
| 20CDC10 | 3-Apr-20 | urine | maternal | 0.25 | <0.06 | 1 | 16 | 32 | 2 | <0.25 | 128 | 0.25 | 0.5 | 512 | 8/4 | 1 | 2 | 1 | <0.125 | 4 |
| 20CDC11 | 14-Apr-20 | blood | maternal | 0.06 | <0.06 | 4 | 32 | 8 | 4 | 0.5 | 2 | 0.25 | 0.25 | >512 | 16/8 | 1 | 4 | 128 | <0.125 | 8 |
| 20CDC12 | 13-Apr-20 | blood | newborn | 0.06 | <0.06 | 2 | 16 | 8 | 4 | 0.5 | 64 | 0.25 | 0.25 | >512 | 32/16 | 1 | 2 | 1 | <0.125 | >256 |
| 20CDC13 | 27-Apr-20 | placenta | maternal | 0.25 | <0.06 | 4 | >32 | 32 | 4 | 0.5 | 64 | 0.25 | 0.25 | >512 | 16/8 | 1 | 16 | >256 | <0.125 | 8 |
| 20CDC14 | 4-Mar-20 | blood | maternal | 0.06 | <0.06 | 1 | 16 | 64 | 8 | 1 | 4 | 0.5 | 0.25 | 512 | 16/8 | 1 | 2 | 1 | <0.125 | 16 |
| 20CDC15 | 19-Jan-20 | uterine incision | maternal | 1 | <0.06 | 0.015 | 32 | 0.5 | 64 | 0.5 | 64 | 0.25 | 0.25 | 128 | >64/32 | 1 | 8 | 128 | <0.125 | 8 |
| 20CDC16 | 20-Jan-20 | cervical secretions | maternal | 0.125 | <0.06 | 16 | >32 | 32 | 8 | 0.5 | 128 | 0.25 | 0.25 | >512 | 16/8 | 1 | 2 | 16 | 0.5 | >256 |
| 20CDC17 | 23-Jan-20 | uterine incision | maternal | 0.06 | <0.06 | 1 | 16 | 16 | 4 | 0.5 | 256 | 0.25 | 0.125 | 512 | 8/4 | 1 | 2 | 1 | 32 | 8 |
| 20CDC18 | 14-Jan-20 | throat swab | newborn | 0.06 | <0.06 | 1 | 16 | 8 | 4 | 1 | 128 | 0.25 | 0.25 | 512 | 8/4 | 1 | 2 | 2 | 0.5 | 8 |
| 20CDC19 | 30-Jan-20 | placenta | maternal | 0.25 | <0.06 | 1 | 32 | 0.5 | 4 | <0.25 | 1 | 0.25 | 0.125 | >512 | 16/8 | 4 | 4 | 2 | 0.25 | 4 |
| 20CDC20 | 7-Apr-20 | placenta | maternal | 0.25 | <0.06 | 0.06 | 0.25 | 0.25 | 128 | 1 | 8 | 0.5 | 0.25 | 512 | >64/32 | 1 | 2 | <0.5 | <0.125 | 16 |
| 20CDC21 | 27-Apr-20 | throat swab | newborn | 0.125 | <0.06 | 2 | 32 | 8 | 4 | 0.5 | 128 | 0.25 | 0.25 | 512 | 8/4 | 1 | 2 | 1 | 32 | 8 |
| 20CDC22 | 26-Apr-20 | throat swab | newborn | 0.125 | <0.06 | 2 | 32 | 8 | 4 | 0.5 | 128 | 0.25 | 0.25 | >512 | 8/4 | 1 | 2 | <0.5 | 16 | 8 |
| 20CDC23 | 18-Dec-19 | placenta | maternal | 0.125 | <0.06 | 1 | 4 | 0.5 | 4 | 1 | 128 | 0.5 | 0.25 | 512 | 8/4 | 1 | 2 | 2 | 0.25 | 128 |
| 20CDC24 | 17-Jan-20 | placenta | maternal | 0.06 | <0.06 | 4 | 32 | 16 | 4 | 1 | 128 | 0.25 | 0.25 | >512 | 16/8 | 1 | 2 | 1 | <0.125 | 8 |
| 20CDC25 | 21-Nov-19 | blood | maternal | 0.06 | <0.06 | 2 | 16 | 8 | 4 | 0.5 | 128 | 0.25 | 0.25 | 512 | 8/4 | 1 | 2 | 2 | 64 | 4 |
| 20CDC26 | 21-Nov-19 | placenta | maternal | 0.06 | <0.06 | 2 | 16 | 4 | 8 | <0.25 | 128 | 0.25 | 0.25 | 512 | 8/4 | 2 | 2 | <0.5 | 32 | 4 |
| 20CDC27 | 21-Nov-19 | placenta | maternal | 0.06 | <0.06 | 2 | 16 | 4 | 4 | <0.25 | 128 | 0.25 | 0.25 | 512 | 8/4 | 1 | 2 | <0.5 | 32 | 4 |
| 20CDC28 | 21-Nov-19 | throat swab | newborn | 0.06 | <0.06 | 2 | 32 | 4 | 4 | 0.5 | 64 | 0.25 | 0.25 | 512 | 8/4 | 1 | 2 | 2 | 32 | 4 |
| 20CDC29 | 21-Nov-19 | placenta | maternal | 0.06 | <0.06 | 2 | 16 | 4 | 8 | <0.25 | 128 | 0.25 | 0.25 | 512 | 8/4 | 2 | 2 | <0.5 | 32 | 4 |
| 20CDC30 | 21-Nov-19 | placenta | maternal | 0.125 | <0.06 | 2 | 16 | 4 | 8 | <0.25 | 128 | 0.25 | 0.25 | 512 | 8/4 | 2 | 2 | 1 | 32 | 4 |
| 20CDC31 | 21-Nov-19 | placenta | maternal | 0.06 | <0.06 | 2 | 16 | 4 | 4 | <0.25 | 128 | 0.25 | 0.25 | 512 | 8/4 | 1 | 2 | <0.5 | 32 | 4 |
| 20CDC32 | 21-Nov-19 | placenta | maternal | 0.06 | <0.06 | 2 | 32 | 4 | 4 | 0.5 | 64 | 0.25 | 0.25 | 512 | 8/4 | 1 | 2 | 2 | 32 | 4 |
| 20CDC33 | 21-Nov-19 | placenta | maternal | 0.125 | <0.06 | 2 | 32 | 8 | 4 | 0.5 | 128 | 0.5 | 0.5 | 512 | 8/4 | 1 | 2 | 1 | 32 | 4 |
